# Supplementary material for: Long-term performance of a 200 liter modularized microbial fuel cell system treating municipal wastewater: treatment, energy, and cost
Source: Royal Society of Chemistry journal article supplement (doi:10.1039/c6ew00020g), 2016-01-01
Supplement: c6ew00020g1.pdf [file c6ew00020g1.pdf]

**Long-term Performance of a 200-Liter Modularized Microbial Fuel Cell  
System Treating Municipal Wastewater: Treatment, Energy, and Cost**

Zheng Ge and Zhen He \*

Department of Civil and Environmental Engineering

Virginia Polytechnic Institute and State University, Blacksburg, VA 24061, USA

\*Corresponding author: phone: (540)231-1346; e-mail: [zhenhe@vt.edu](mailto:zhenhe@vt.edu)

**Supplementary information**

**Table S1.** pH and conductivity of influent, anode effluent, and final effluent

|                         | Influent | Group 1 | Group 2 | Group 3 | Group 4 | Effluent |
|-------------------------|----------|---------|---------|---------|---------|----------|
| pH                      | 8.2      | 7.1     | 6.8     | 6.9     | 6.9     | 7.6      |
|                         | ± 0.5    | ± 0.5   | ± 0.4   | ± 0.4   | ± 0.4   | ± 0.4    |
| Conductivity<br>(ms/cm) | 1.1      | 1.0     | 0.9     | 1.0     | 1.0     | 1.0      |
|                         | ± 0.2    | ± 0.2   | ± 0.2   | ± 0.2   | ± 0.2   | ± 0.1    |

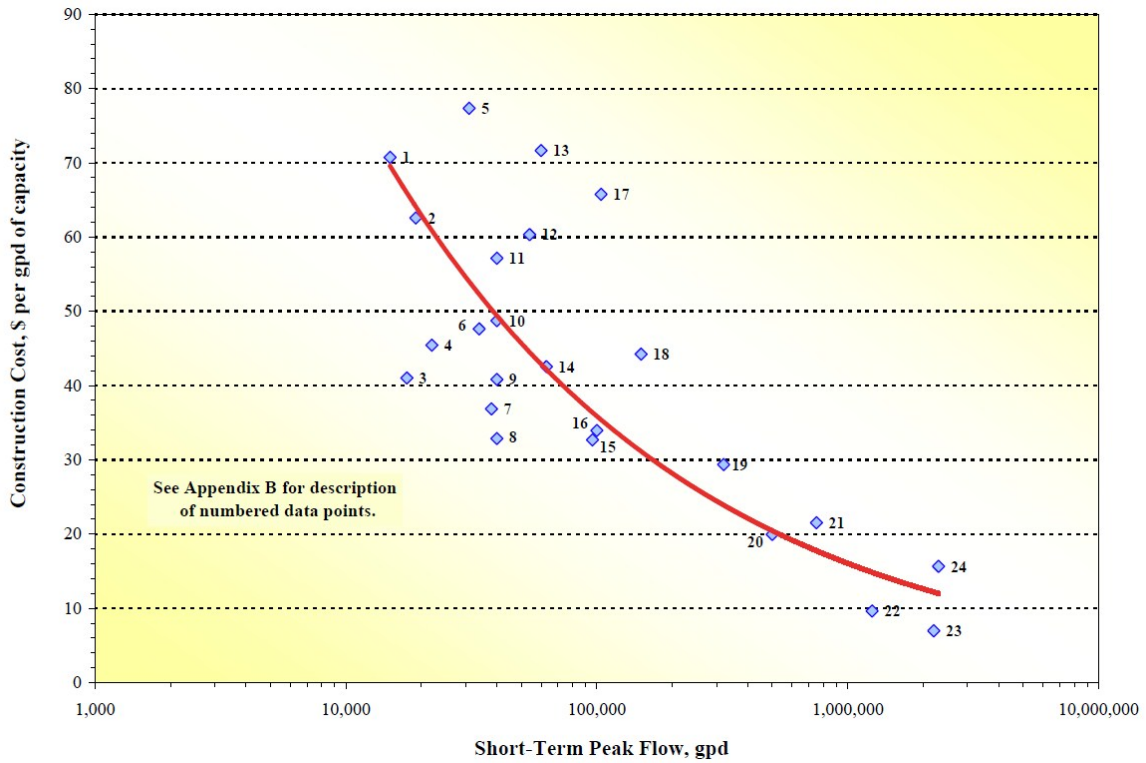

**Figure S1.** The total cost data from small-scale wastewater systems in southeastern Massachusetts (reproduced from a previous report <sup>1</sup>).

**References**

1. *Comparison of costs for wastewater management systems*, Barnstable County Wastewater Cost Task Force ([http://www.ccwpc.org/images/educ\\_materials/wwreports/cape\\_cod\\_ww\\_costs--4-10.pdf](http://www.ccwpc.org/images/educ_materials/wwreports/cape_cod_ww_costs--4-10.pdf)), 2010.
